# Supplementary material for: A cobalt metal–organic framework (Co-MOF): a bi-functional electro active material for the oxygen evolution and reduction reaction
Source: Royal Society of Chemistry journal article supplement (doi:10.1039/c9dt01730e), 2019-01-01
Supplement: c9dt01730e1.pdf [file c9dt01730e1.pdf]

## Supporting Information

### **Cobalt Metal Organic Framework (Co-MOF): A bi-functional Electro active material for Oxygen Evolution and Reduction Reaction**

Rajat K. Tripathy,<sup>a,b,#</sup> Aneeya K. Samantara<sup>a,b,#</sup> and J. N Behera<sup>a,b,\*</sup>

<sup>a</sup> School of Chemical Sciences, National Institute of Science Education and Research (NISER),  
P.O. Jatni, Khurda 752050, Odisha, India

<sup>b</sup> Homi Bhabha National Institute, Mumbai, India

<sup>#</sup> Both the authors contributed equally.

## Calculation of mass activity and Turnover frequency (TOF)

The mass activity (A/g) of all the samples were calculated by dividing the observed current density (at  $\eta=370$  mV) by the mass of electrocatalyst loaded onto the working electrode surface as per the following equation,<sup>1</sup>

$$MA = \frac{j}{m}$$

Further the number of moles of active site are determined by dividing the molecular mass of the sample to the mass of material loaded ( $0.25 \text{ mg/cm}^2$ ) onto the electrode surface. The values of TOF were evaluated by assuming all the metal ions as the active catalytic centers as per the following equation,

$$TOF = \frac{j \times S}{4 \times F \times n}$$

Here,  $j$ ,  $S$ ,  $F$  and  $n$  are the observed current density, geometrical surface area of the working electrode ( $0.19 \text{ cm}^2$ ), faraday constant ( $96485.3 \text{ C mol}^{-1}$ ) and number of moles of active sites present in the catalyst taken. Since four electrons are needed to evolve one mole of  $\text{O}_2$ , so the term  $\frac{1}{4}$  is used.

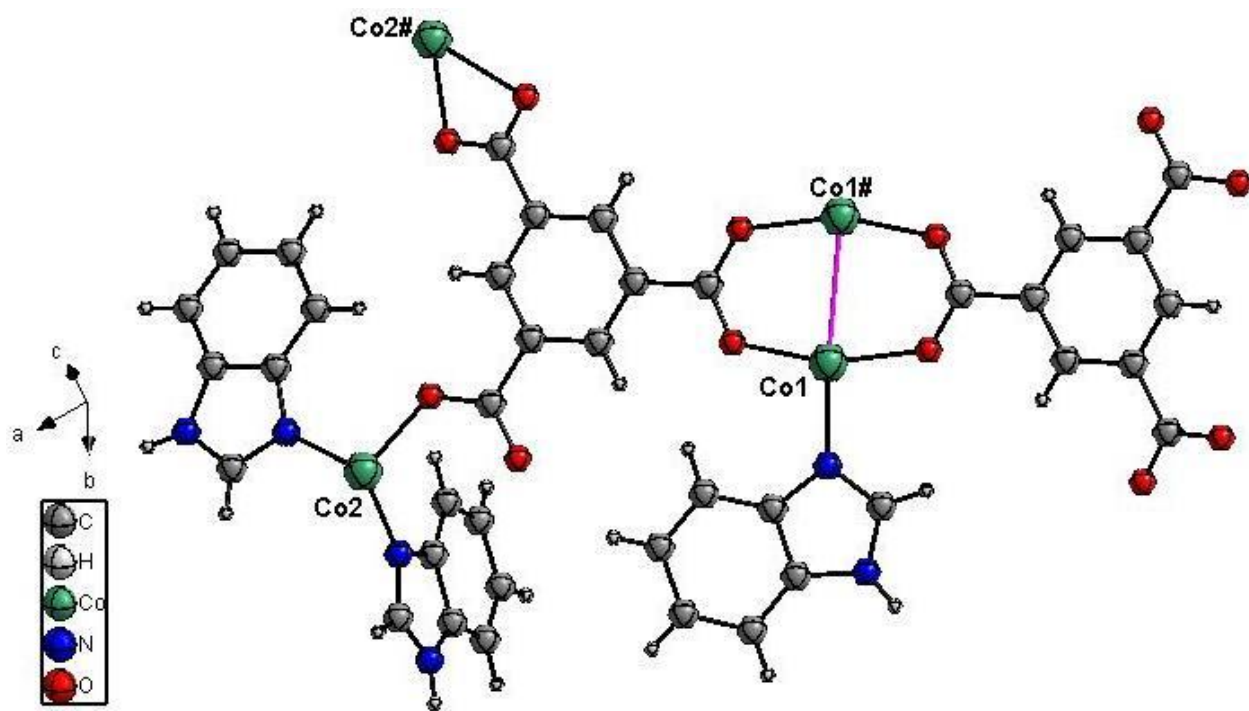

**Figure S 1** Asymmetric unit of [Co<sub>4</sub>(BTC)<sub>3</sub>(BIM)<sub>6</sub>] [solvent]

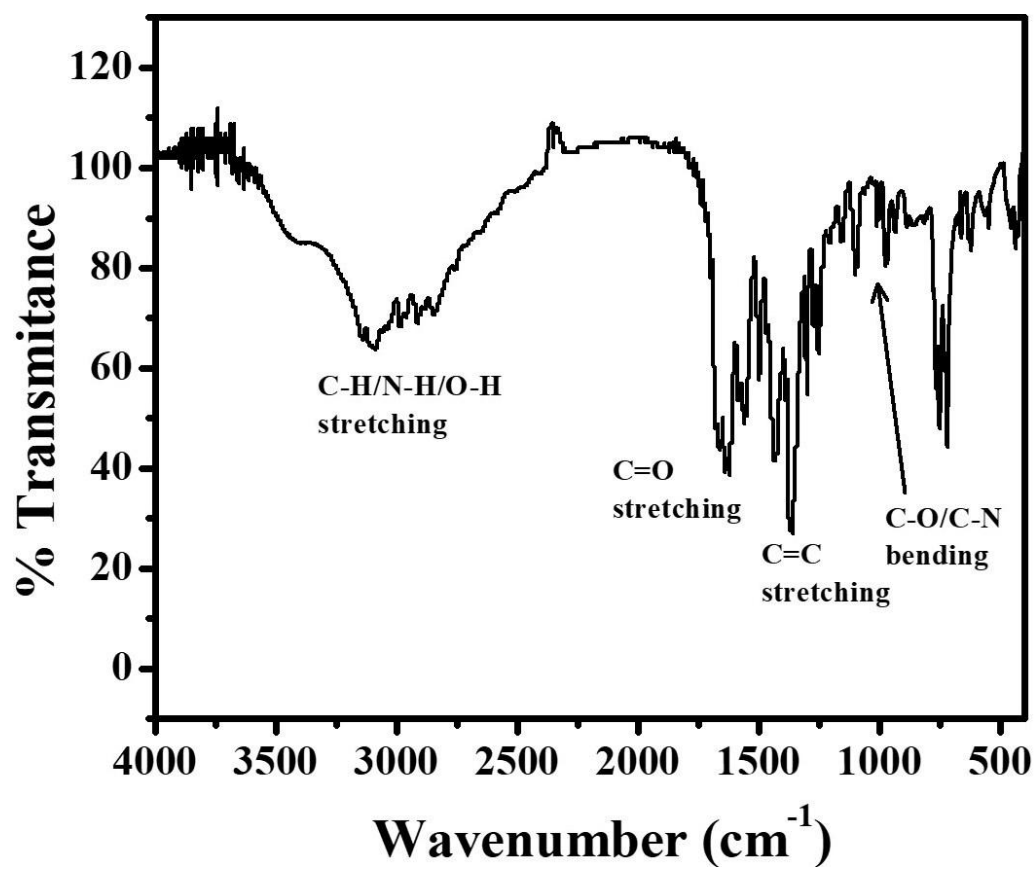

Figure S 2 FTIR spectrum of Co-MOF

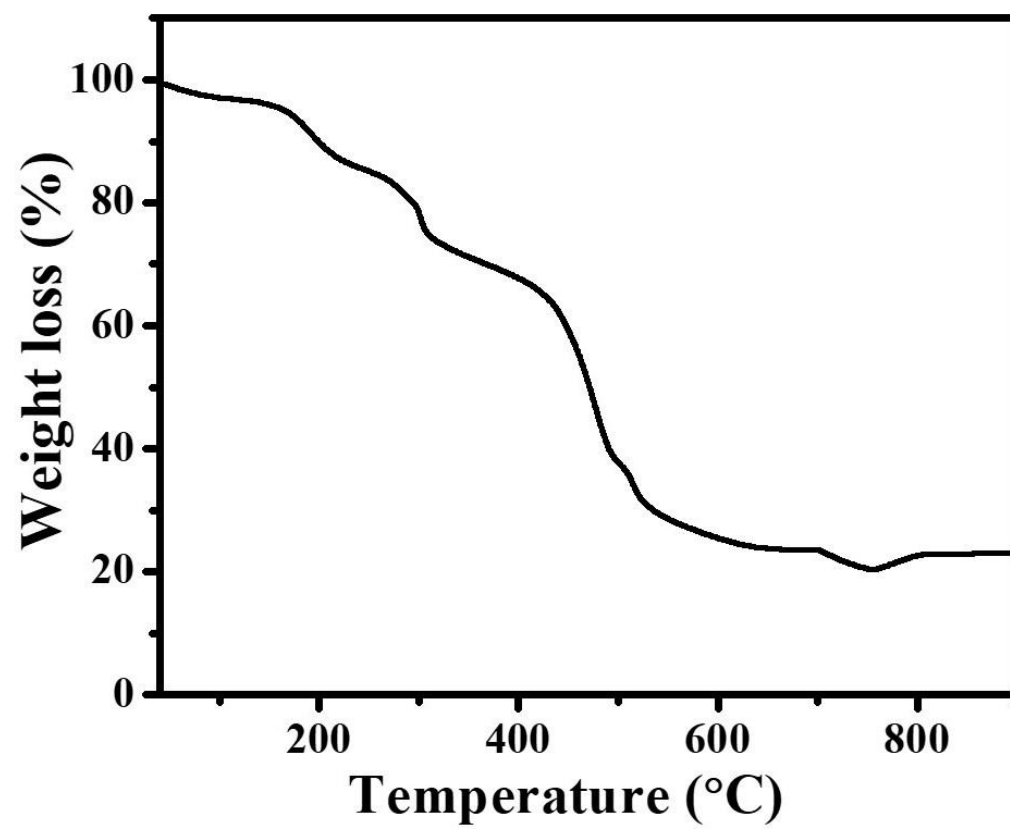

**Figure S 3** Thermo gravimetric analysis of the Co-MOF

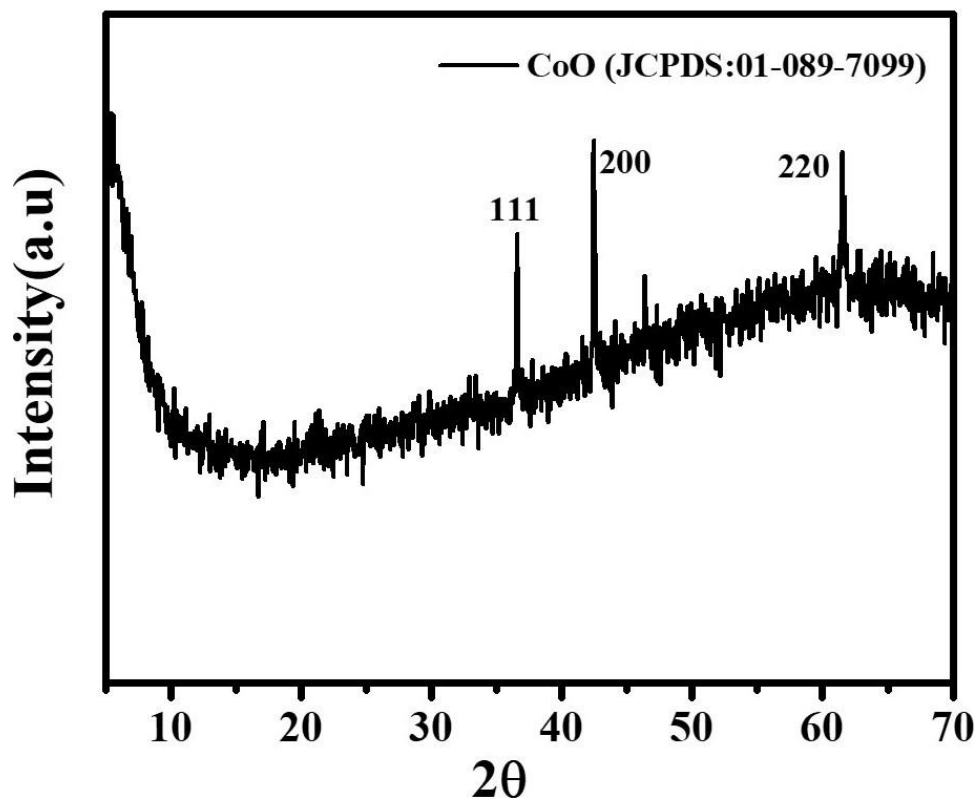

**Figure S 4** X-ray diffraction pattern of Co-MOF after the thermo gravimetric analysis.

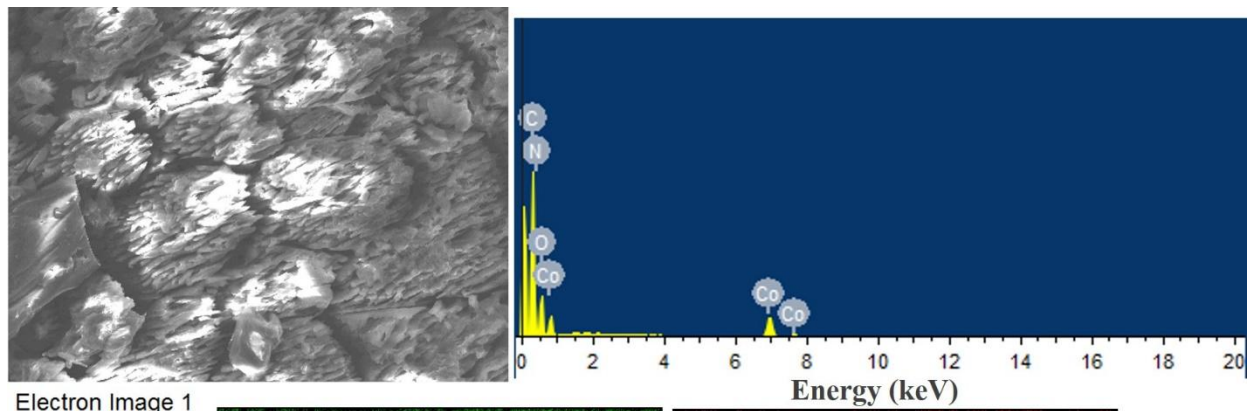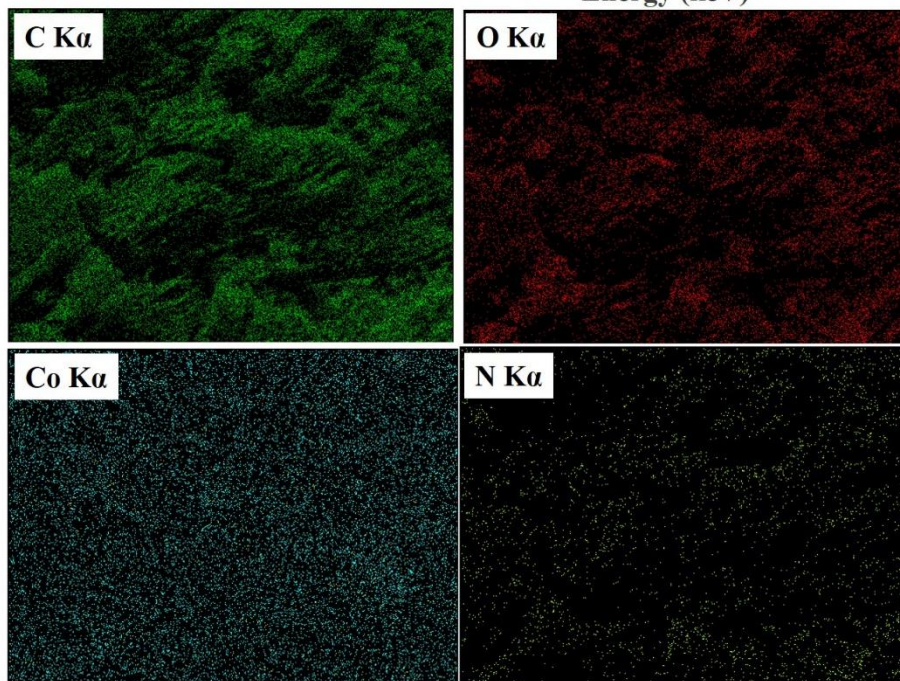

**Figure S 5** EDS spectrum and corresponding elemental mapping of Co-MOF.

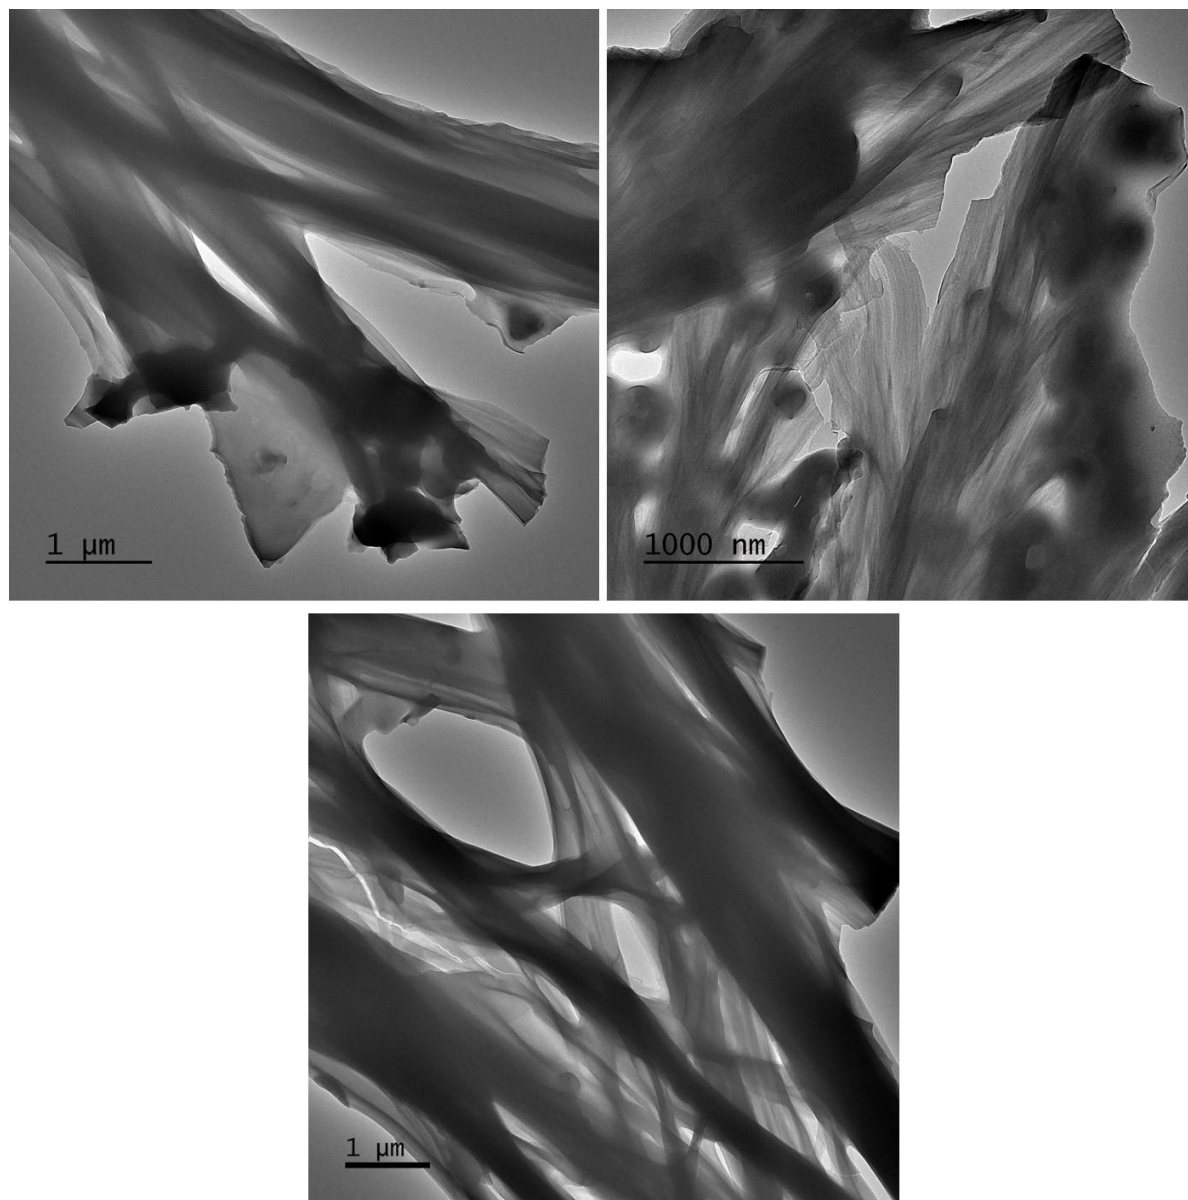

**Figure S 6** Transmission electron microscopic images of Co-MOF.



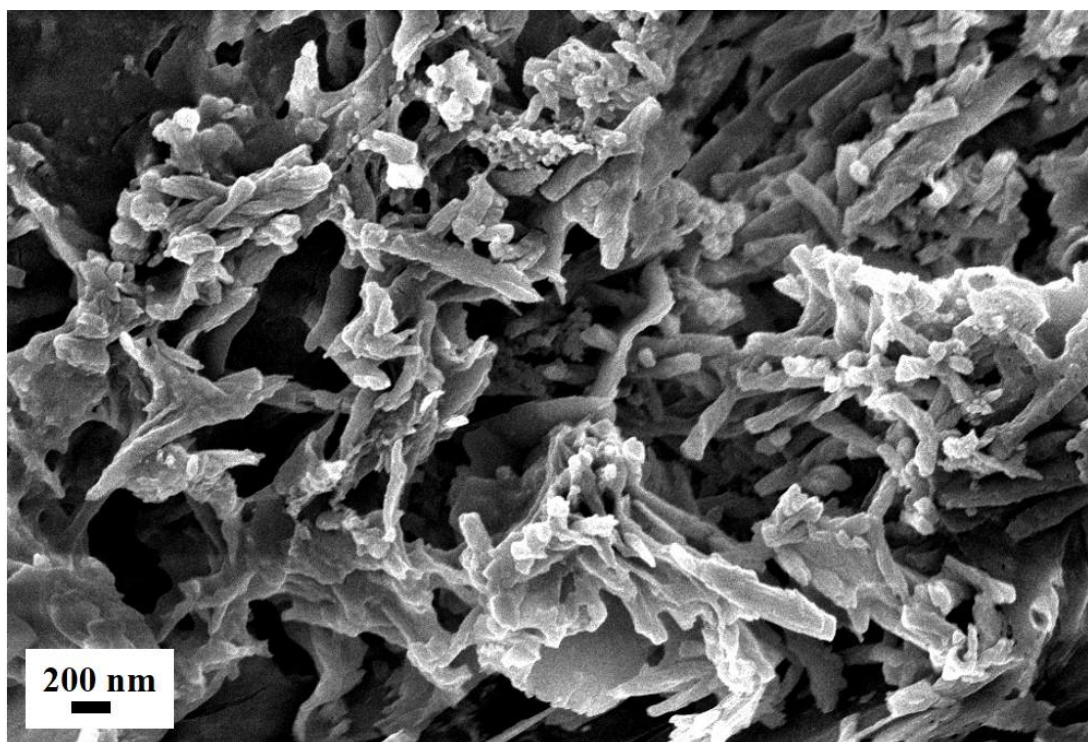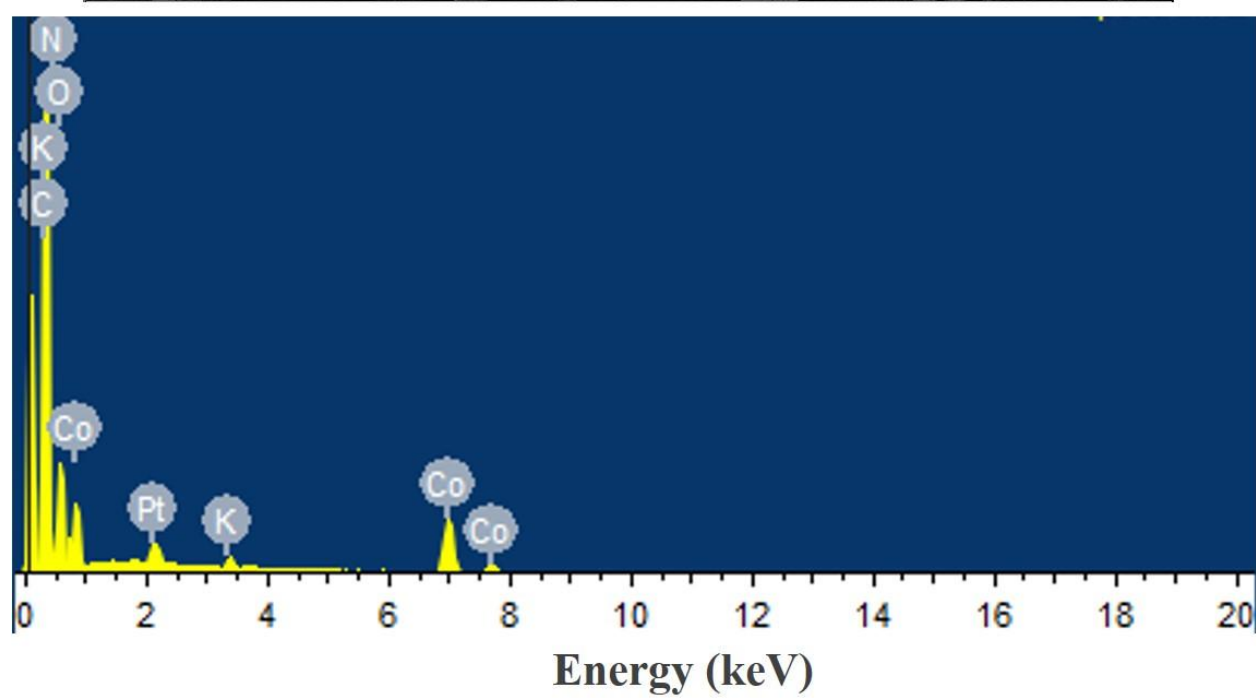

**Figure S 7** FESEM, EDS and XRD pattern of Co-MOF after the ORR stability measurement.

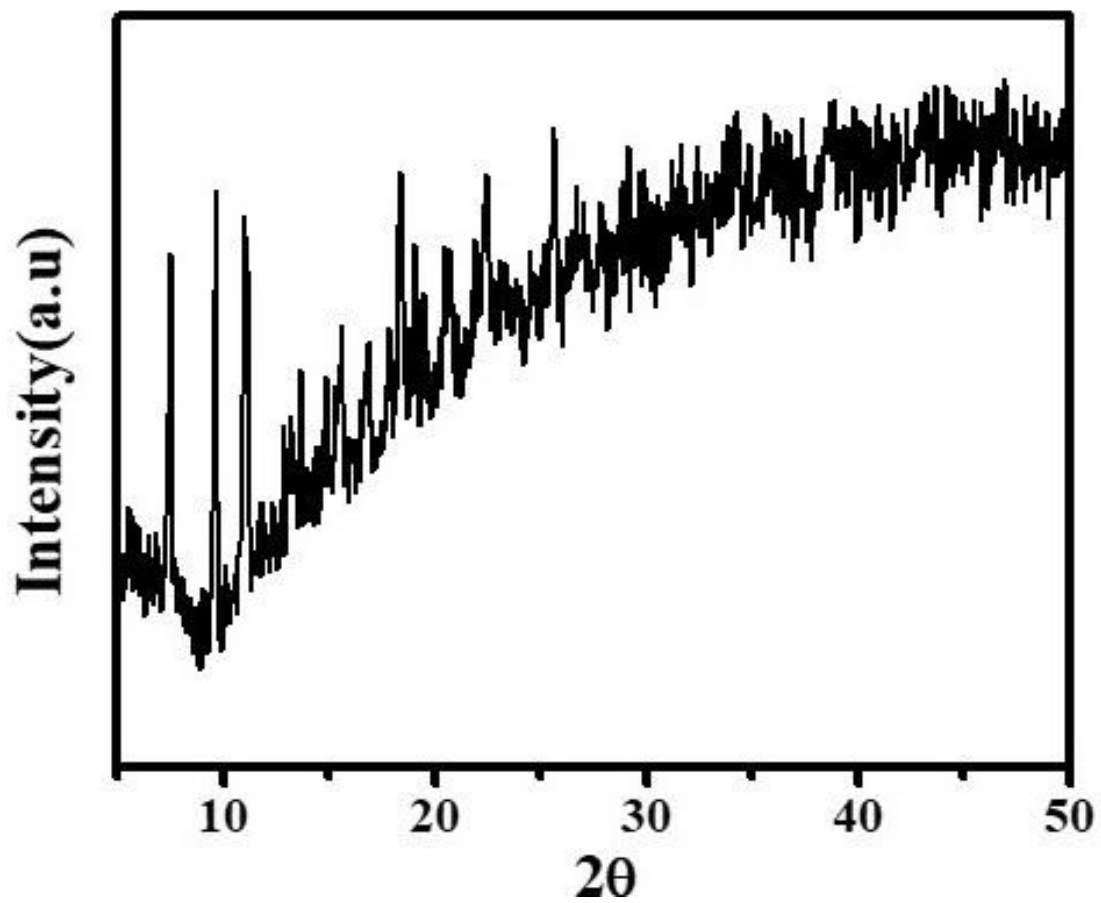

**Figure S 8** X-ray diffraction pattern for Co-MOF after ORR stability test

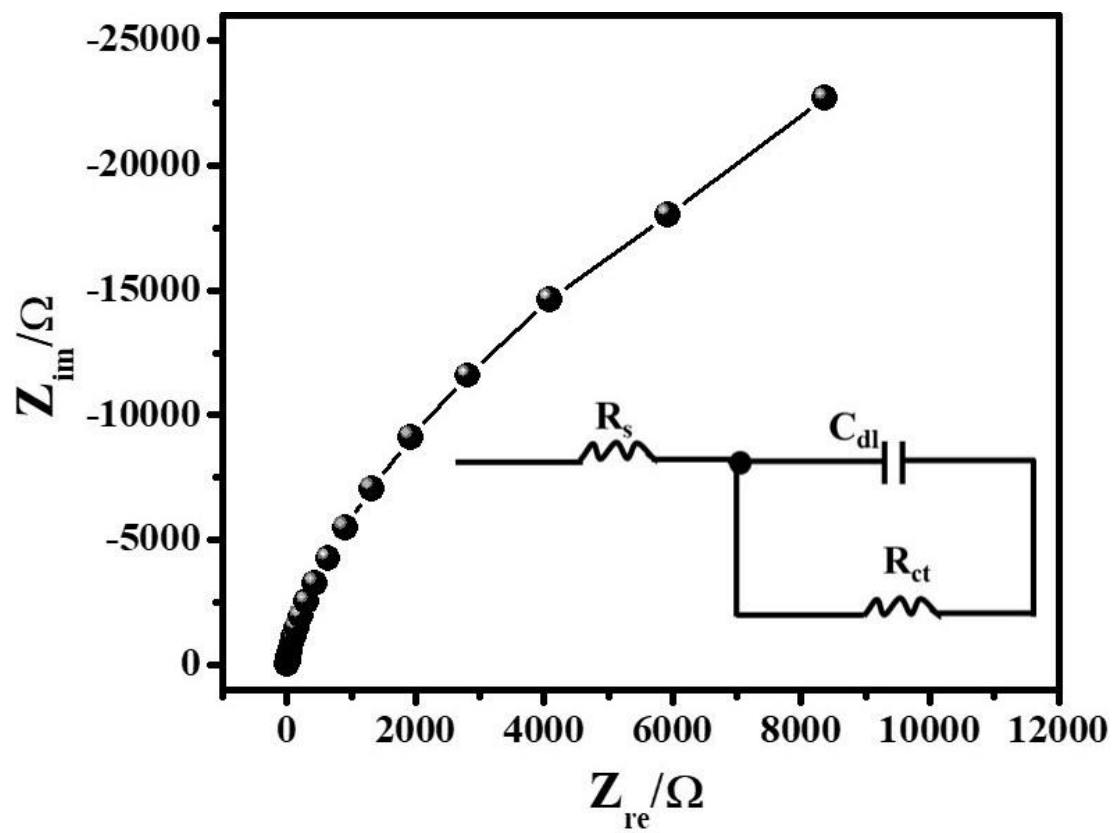

**Figure S 9** Nyquist impedance spectrum of Co-MOF. Inset is the fitted circuit diagram.

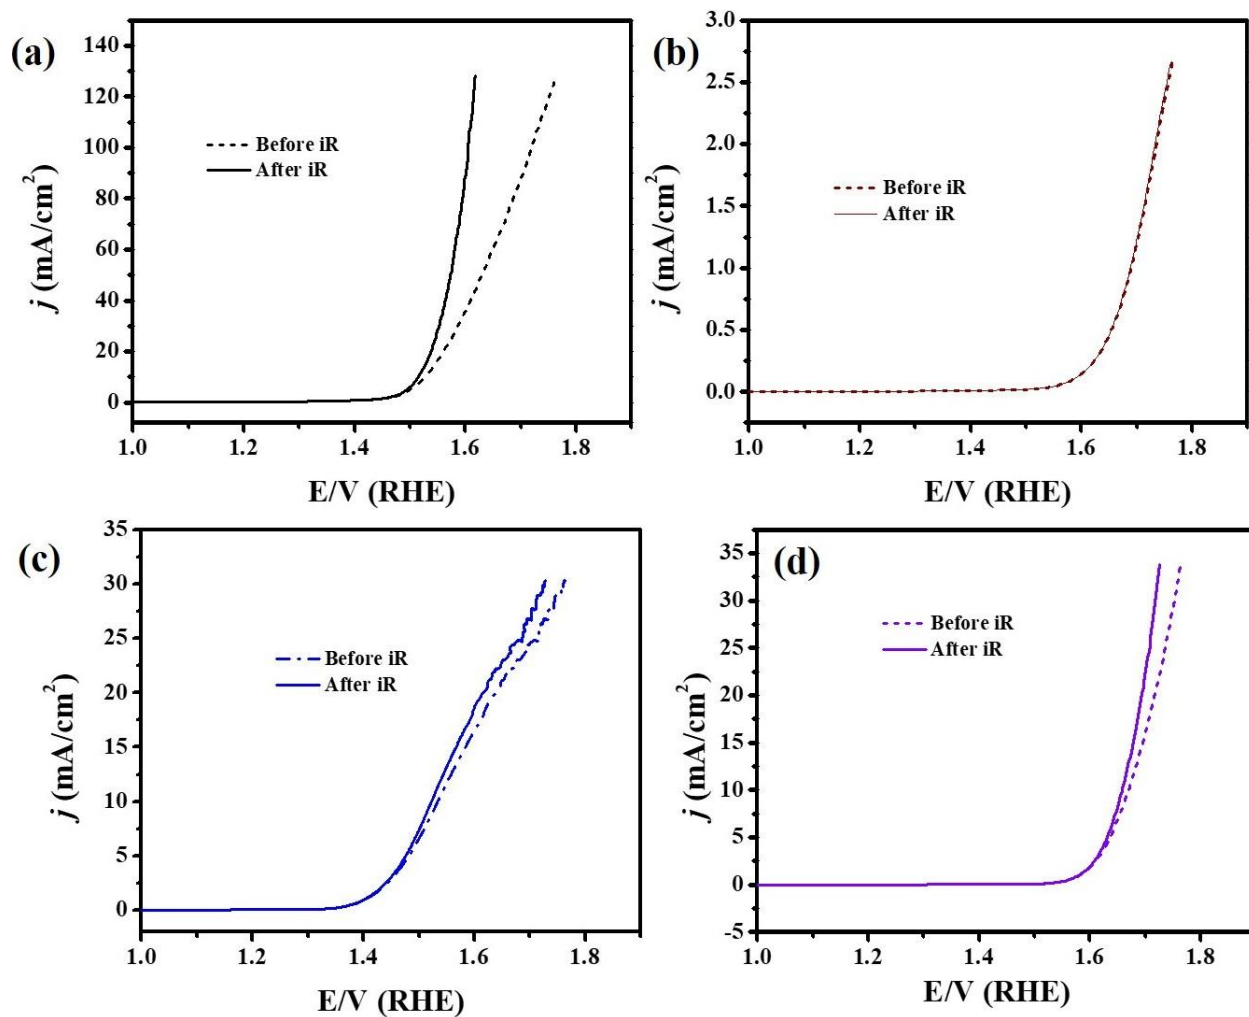

**Figure S 10** Linear sweep voltammograms for Co-MOF (a), AB (b), commercial RuO<sub>2</sub> (c) and CoO after TGA (d) for OER before and after the iR-compensation in 1 M KOH electrolyte at a sweep rate of 5 mV/s.

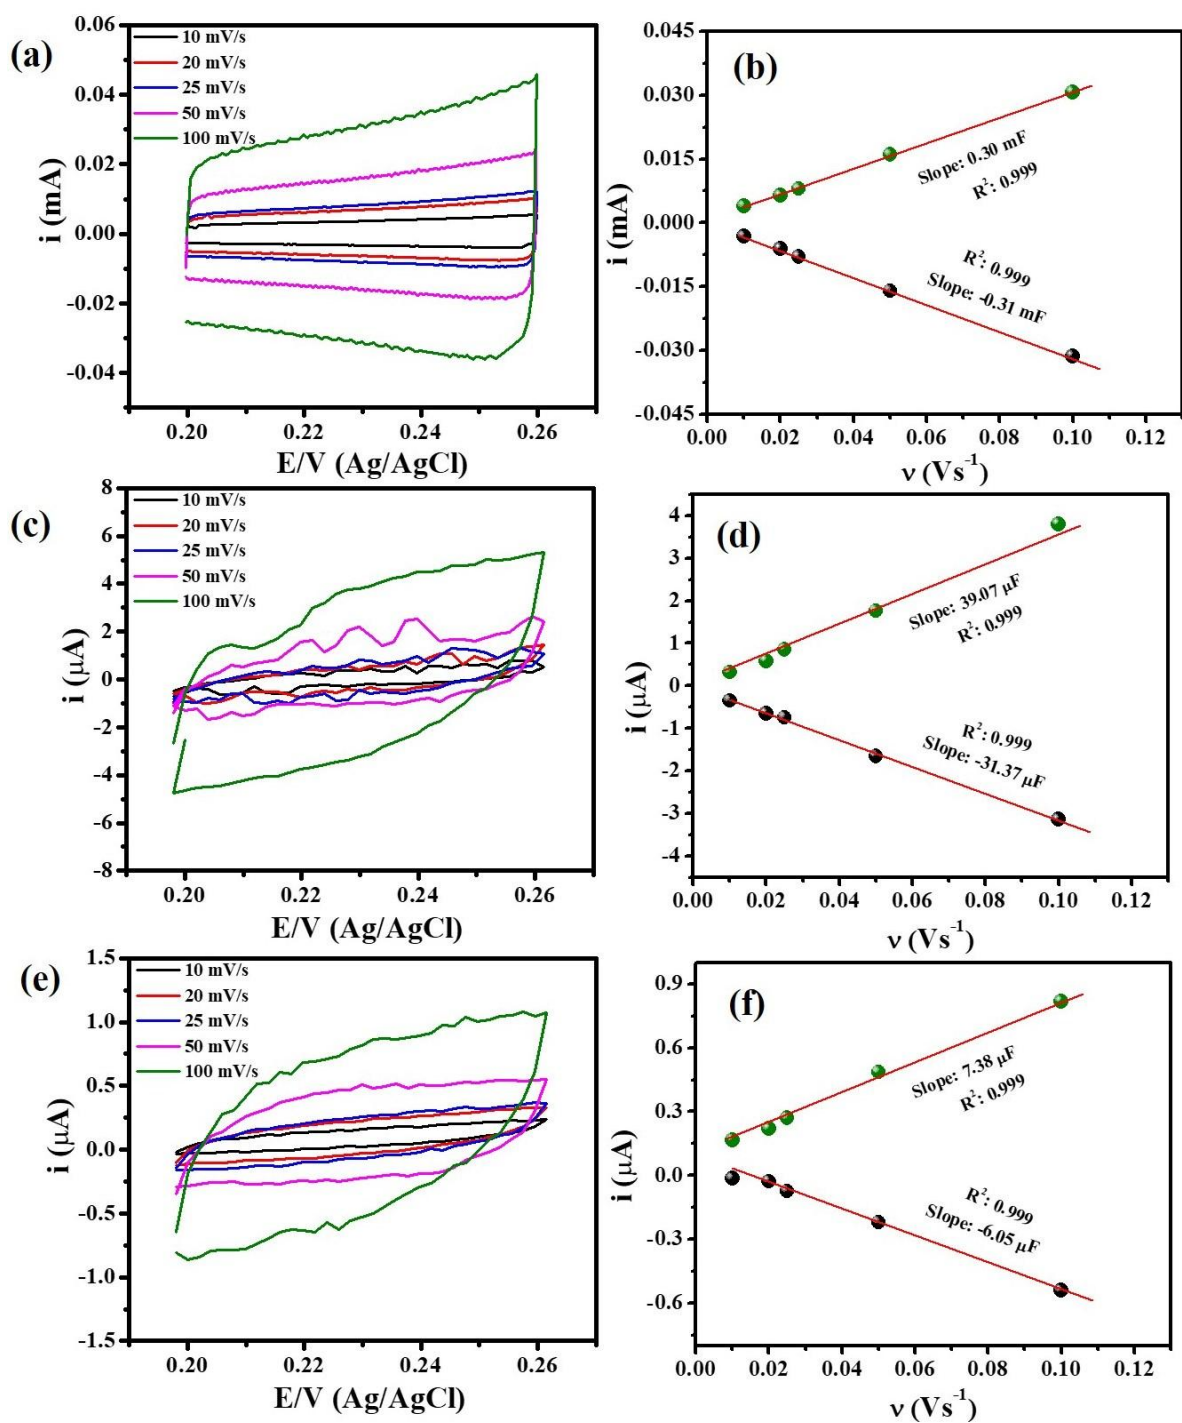

**Figure S 11** Cyclic voltammogram at different sweep rates and plot of current density at 0.23 V vs. Ag/AgCl to the sweep rate to determine the double layer capacitance by commercial RuO<sub>2</sub> (a, b), Co<sub>3</sub>O<sub>4</sub> (c, d) and AB (e, f) modified GCE in 1 M KOH electrolyte.

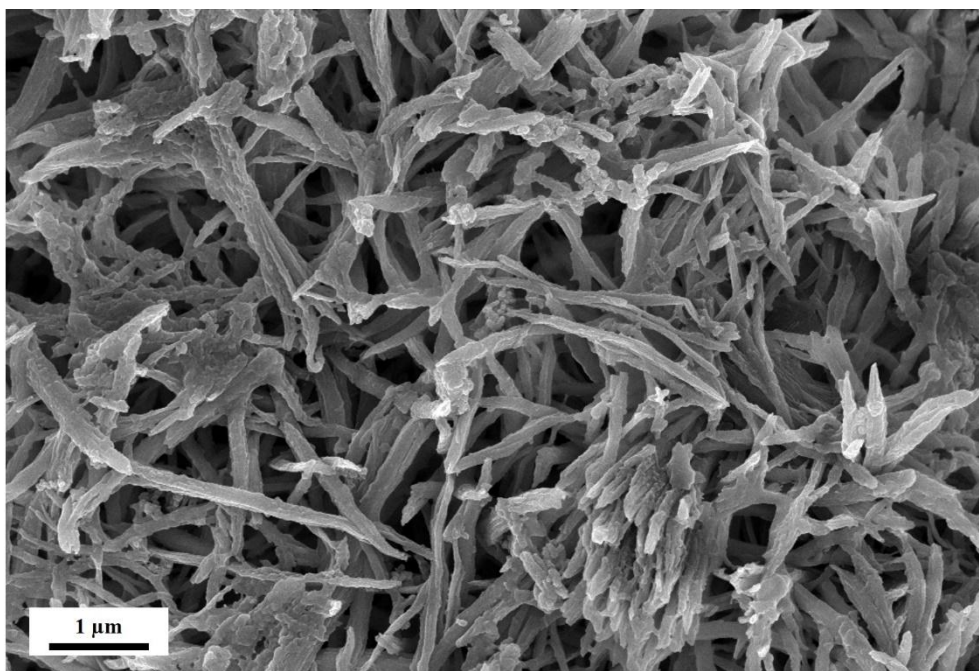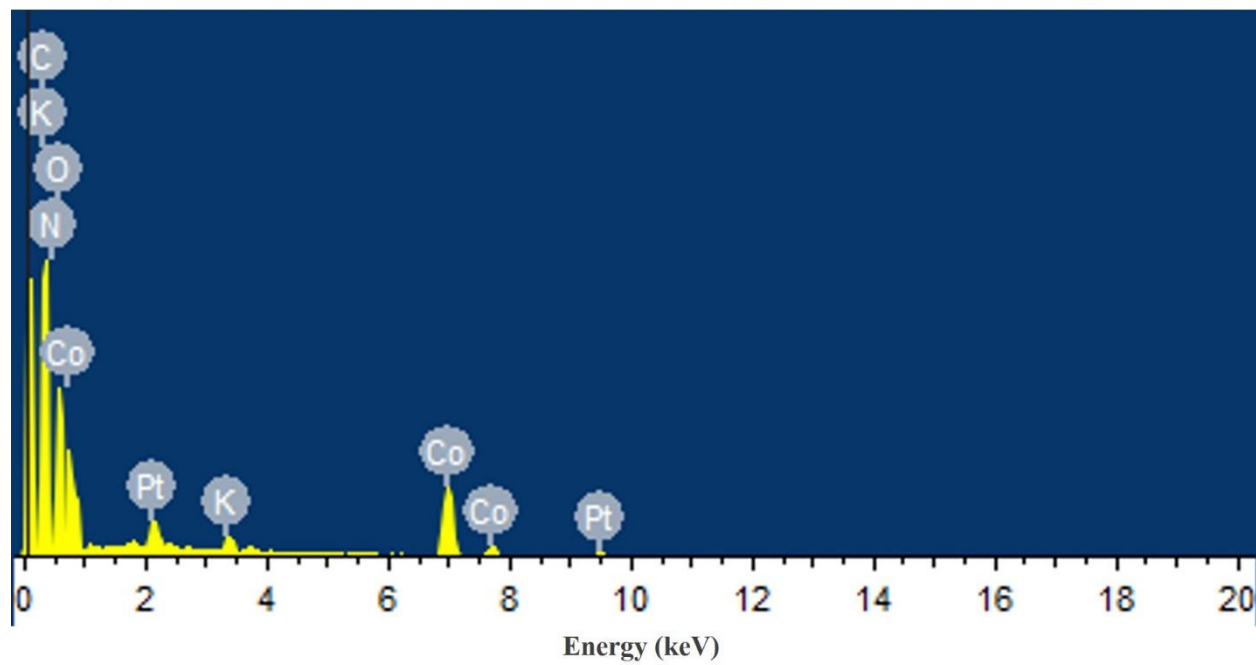

**Figure S 12** FESEM, EDS and XRD pattern of Co-MOF after the OER stability measurement.

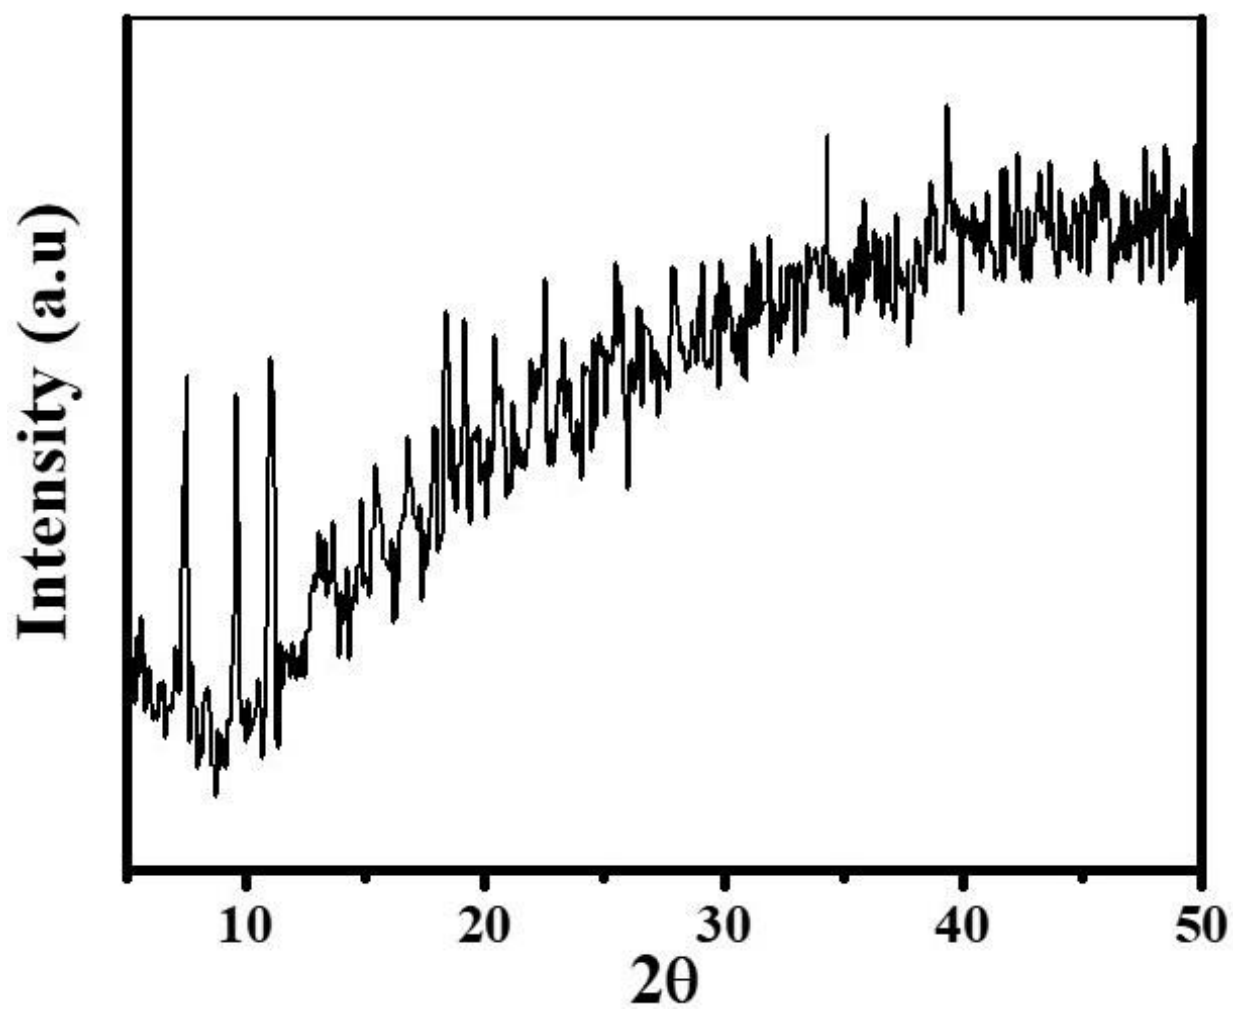

**Figure S 13** X-ray diffraction pattern for Co-MOF after OER stability test

| Sl. No | Catalysts                                                                            | Electrolyte (Conc.)                  | Overpotential (mV)                                                     | Tafel Slope (mV/dec) | Reference                                         |
|--------|--------------------------------------------------------------------------------------|--------------------------------------|------------------------------------------------------------------------|----------------------|---------------------------------------------------|
| 1      | NiCo-UMOFNs                                                                          | 1 M KOH                              | 250@10 mA cm <sup>-2</sup>                                             | 142                  | Nat. Energy, 2016, 1, 16181.                      |
| 2      | [Co(C <sub>12</sub> H <sub>6</sub> O <sub>4</sub> )(H <sub>2</sub> O) <sub>4</sub> ] | 0.1 M KOH                            | 520@10 mA cm <sup>-2</sup>                                             | 42                   | J. Am. Chem. Soc. 2014, 136, 13925                |
| 3      | Fe <sub>3</sub> -Co <sub>2</sub>                                                     | 0.1 M KOH                            | GC:283@10 mA·cm <sup>-2</sup><br>Cu<br>Foam:237@10 mA cm <sup>-2</sup> | 43<br>79             | J. Am. Chem. Soc. 2017, 139, 1778                 |
| 4      | Co-WOC-1                                                                             | 0.1 M KOH                            | 390@1 mA cm <sup>-2</sup>                                              | 128                  | Angew. Chem. Int. Ed. 2016, 55, 2425.             |
| 5      | Cu-MOF                                                                               | 0.5 M H <sub>2</sub> SO <sub>4</sub> | 310@2 mA cm <sup>-2</sup>                                              | 65                   | Adv. Funct. Mater. 2013, 23, 5363.                |
| 6      | Co-TpBpy                                                                             | pH = 7                               | 400@1 mA cm <sup>-2</sup>                                              | 59                   | Chem. Mater. 2016, 28, 4375.                      |
| 7      | CoO <sub>x</sub> -ZIF                                                                | 1M KOH                               | 318@10 mA cm <sup>-2</sup>                                             | 70.3                 | Adv. Funct. Mater. 2017, 1702546.                 |
| 9      | NiFe LDH/NF                                                                          | 1M KOH                               | 240@10 mAcm <sup>-2</sup>                                              | ----                 | Science 2014, 345, 1593                           |
| 10     | MAF-X27-OH                                                                           | 1M KOH                               | 387@10 mA cm <sup>-2</sup>                                             | ----                 | J. Am. Chem. Soc. 2016, 138, 8336-8339            |
| 11     | Co-ZIF-9                                                                             | pH = 13.4                            | 510@10 mA cm <sup>-2</sup>                                             | ----                 | Nanoscale 2014, 6, 9930-9934.                     |
| 12     | FeTPyP-Co                                                                            | 0.1M NaOH                            | 330@10 mA cm <sup>-2</sup>                                             | ----                 | J. Am. Chem. Soc. 2016, 138, 3623-3626            |
| 13     | CoTPyP                                                                               | 0.1M NaOH                            | 400@10 mAcm <sup>-2</sup>                                              | ----                 | J. Am. Chem. Soc. 2016, 138, 3623-3626            |
| 14     | FeTPyP                                                                               | 0.1 M NaOH                           | 400@10 mA cm <sup>-2</sup>                                             | ----                 | J. Am. Chem. Soc. 2016, 138, 3623-3626            |
| 15     | NU-1000                                                                              | pH = 11                              | 566@10 mA cm <sup>-2</sup>                                             | ----                 | ACS Appl. Mater. Interfaces 2015, 7, 28223-28230. |
| 16     | Fe-CoS <sub>2</sub> Nanosheets                                                       | 1.0 M KOH                            | 302@10 mA cm <sup>-2</sup>                                             | 128                  | Chem. Commun., 2019,55, 2469-2472.                |
| 17     | CoS <sub>2</sub> hollow Nano sphere                                                  | 1.0 M KOH                            | 290@10 mA cm <sup>-2</sup>                                             | 57                   | Nanoscale, 2018,10, 4816-4824.                    |
| 18     | NiCo <sub>2</sub> O <sub>4</sub> nanoparticles                                       | 1.0 M KOH                            | 350@10 mA cm <sup>-2</sup>                                             | 43                   | Chem Cat Chem, 2019, 11, 412 – 416.               |
| 19     | N, S-codoped graphene supported CoS <sub>2</sub>                                     |                                      | 393@10 mA cm <sup>-2</sup>                                             | 81                   | J. Power Source, 2018, 389, 178-187.              |
| 20     | Co-MOF                                                                               | 1 M KOH                              | 280@10 mA cm <sup>-2</sup>                                             | 51                   | This work                                         |
| 21     | Commercial RuO <sub>2</sub>                                                          | 1 M KOH                              | 330@10 mA cm <sup>-2</sup>                                             | 72                   |                                                   |



|    |                                           |         |                            |    |  |
|----|-------------------------------------------|---------|----------------------------|----|--|
| 22 | Co <sub>3</sub> O <sub>4</sub> (post TGA) | 1 M KOH | 430@10 mA cm <sup>-2</sup> | 71 |  |
|----|-------------------------------------------|---------|----------------------------|----|--|

**Table S1.** Table showing the comparison of activity of the Co-MOF of the present work with the reported metal organic frameworks for oxygen evolution reaction.

## References

1. Min-Rui Gao, Xuan Cao, Qiang Gao, Yun-Fei Xu, Ya-Rong Zheng, Jun Jiang, and Shu-Hong Yu, Nitrogen-Doped Graphene Supported CoSe<sub>2</sub> Nanobelt Composite Catalyst for Efficient Water Oxidation, *ACS Nano* 2014 8 (4), 3970-3978.
